# Supplementary material
Source: publisher site journal article supplement (https://www.e-cmh.org/upload/media/cmh-2022-0327-Supplementary-Fig-8.pdf)
Supplement: Supplementary file 1 [file cmh-2022-0327-Supplementary-Fig-8.pdf]

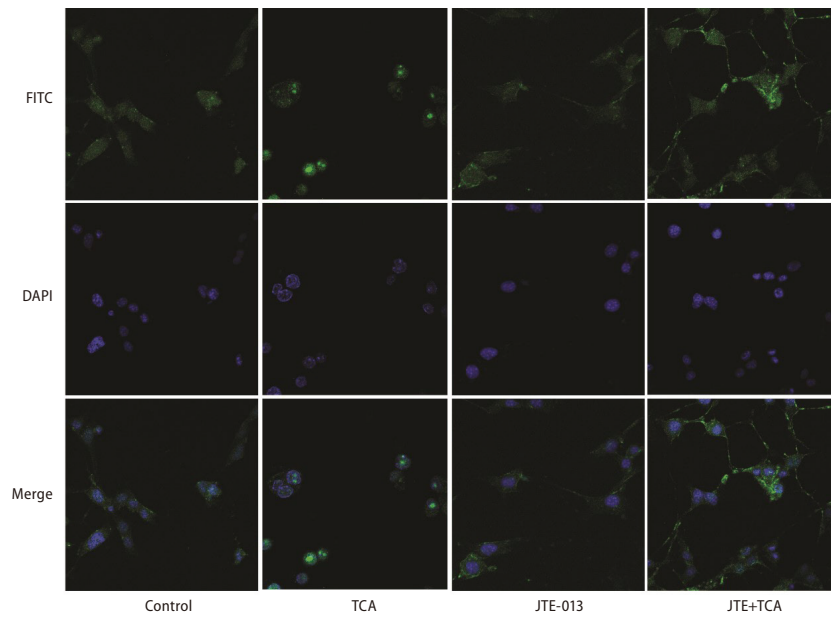

**Supplementary Figure 8.** YAP (green) distribution in the JS-1 cells was observed by immunofluorescence staining. YAP, yes-associated protein; TCA, taurocholic acid.
